# Supplementary material for: Effect of Ti3C2Tx–PEDOT:PSS modified-separators on the electrochemical performance of Li–S batteries
Source: Royal Society of Chemistry journal article supplement (doi:10.1039/d0ra06380k), 2020-01-01
Supplement: d0ra06380k1.pdf [file d0ra06380k1.pdf]

## Supporting Information

### Effect of the $\text{Ti}_3\text{C}_2\text{T}_x$ -PEDOT: PSS Modified-Separators on the electrochemical performance of Li-S batteries

Juan Li<sup>a,1</sup>, Qi Jin<sup>a,1</sup>, Fei Yin<sup>a</sup>, Chuncheng Zhu<sup>a</sup>, XiTian Zhang<sup>a,\*</sup>, and Zhiguo Zhang<sup>b</sup>

<sup>a</sup> *Laboratory for Photonic and Electronic Bandgap Materials, Ministry of Education, School of Physics and Electronic Engineering, Harbin Normal University, Harbin 150025, People's Republic of China.*

<sup>b</sup> *Condensed Mater Science and Technology Institute, Department of Physics, Harbin Institute of Technology, Harbin 150001, People's Republic of China.*

---

<sup>1</sup> These authors contributed equally to this work.

\* Corresponding author: E-mail: [xtzhangzhang@hotmail.com](mailto:xtzhangzhang@hotmail.com) (X.T. Zhang).

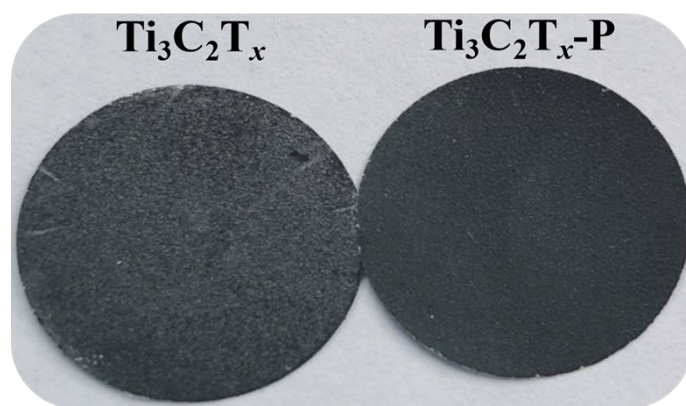

**Fig. S1** Digital photographs of (a) pure  $\text{Ti}_3\text{C}_2\text{T}_x$  and (b)  $\text{Ti}_3\text{C}_2\text{T}_x\text{-P}$  modified separators.

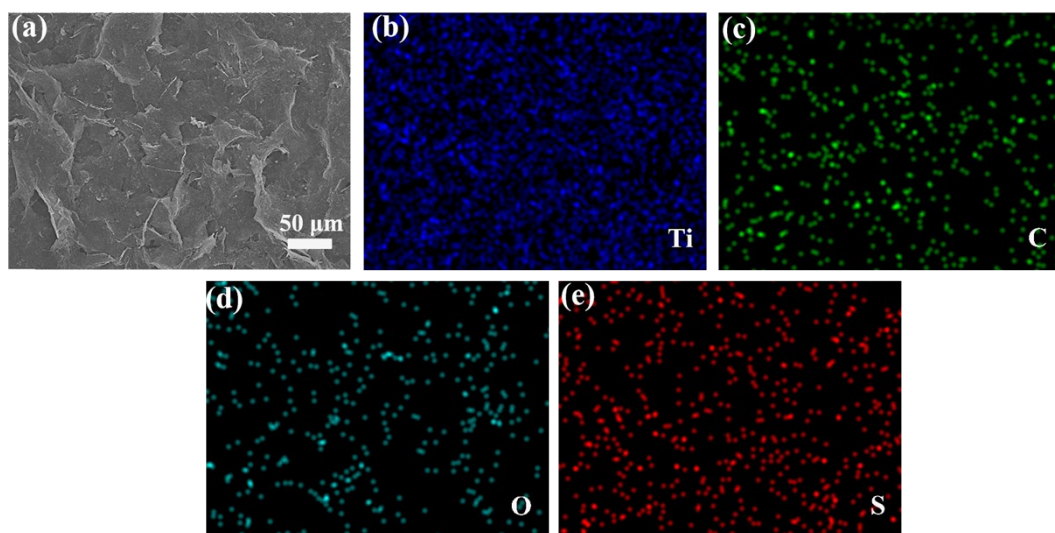

**Fig. S2** (a) SEM image of the  $\text{Ti}_3\text{C}_2\text{T}_x\text{-P}$  hybrid. (b-e) Elemental mapping images of Ti/C/O/S element for the  $\text{Ti}_3\text{C}_2\text{T}_x\text{-P}$  hybrid.

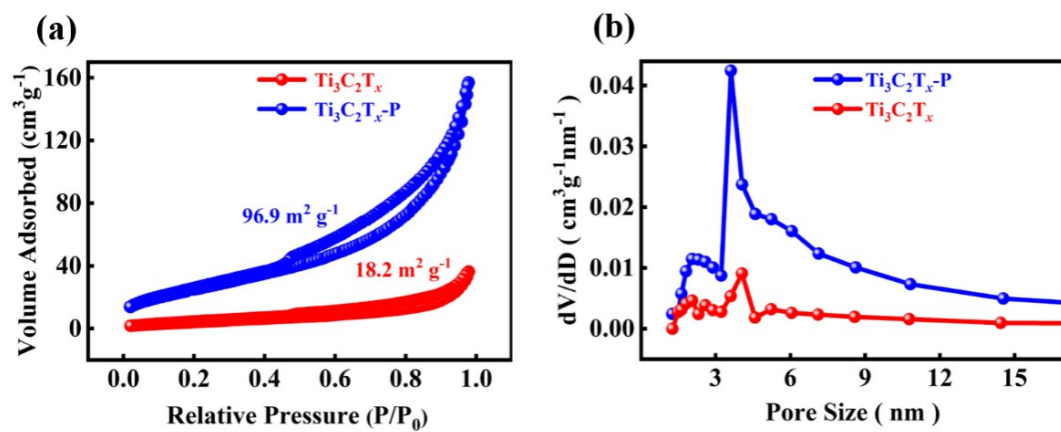

**Fig. S3** (a)  $N_2$  adsorption-desorption isotherms and (b) pore size distribution plot of the  $Ti_3C_2T_x$  nanosheets and  $Ti_3C_2T_x-P$  hybrid, respectively.

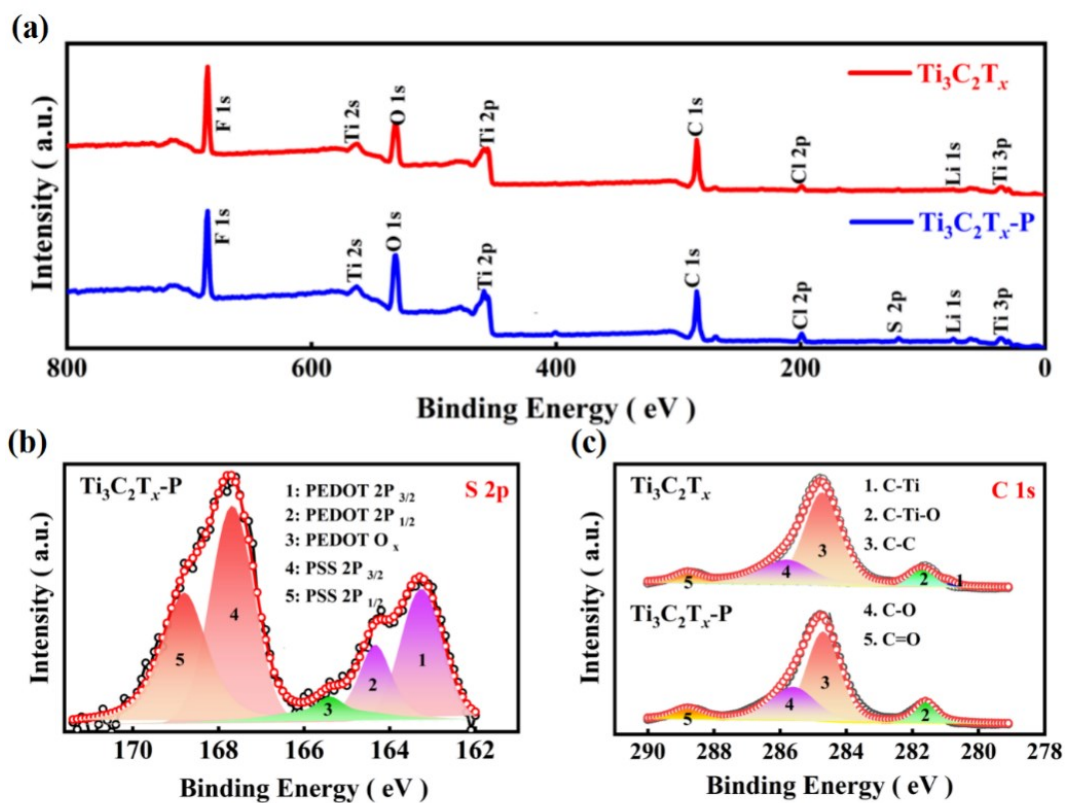

**Fig. S4** (a) Survey XPS spectra. High-resolution (b) S 2p and (c) C 1s XPS spectra of  $\text{Ti}_3\text{C}_2\text{T}_x$  nanosheets and  $\text{Ti}_3\text{C}_2\text{T}_x\text{-P}$  hybrid.

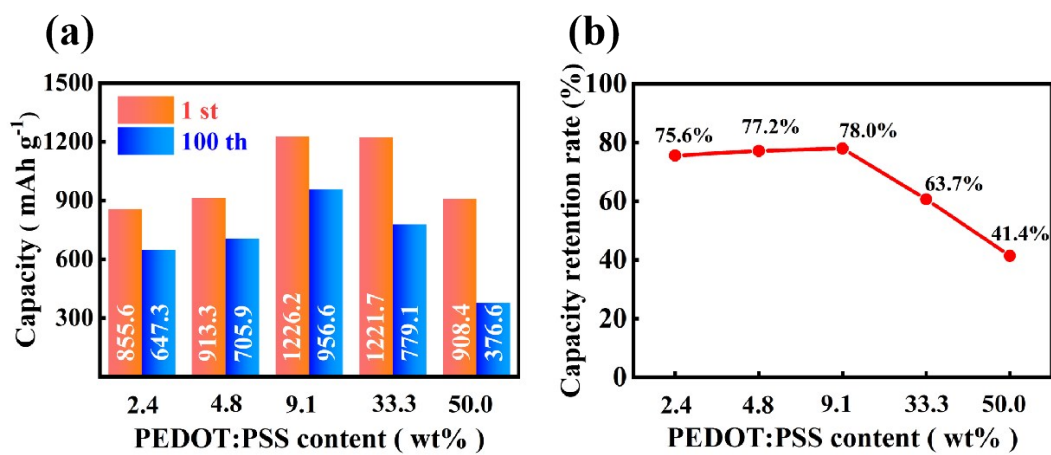

**Fig. S5** (a) The cell capacity as a function of the PEDOT: PSS content for the first cycle (red) and the 100<sup>th</sup> (blue) at a current density of 0.5 C. (b) Capacity retention rate as a function of the PEDOT: PS content.

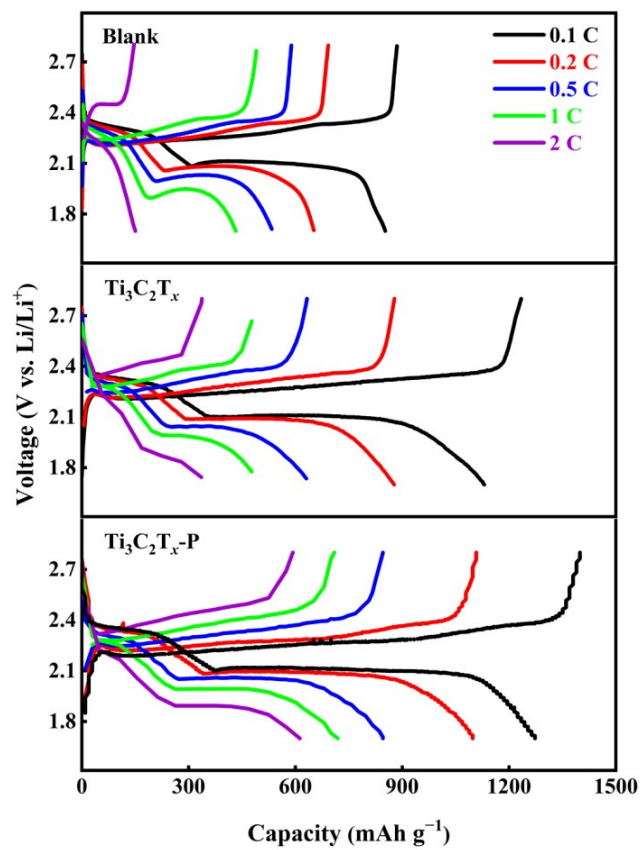

**Fig. S6** GCD profiles of the cells with (a) blank, (b)  $\text{Ti}_3\text{C}_2\text{T}_x$ -modified and (c)  $\text{Ti}_3\text{C}_2\text{T}_x\text{-P}$  separators at different current densities.

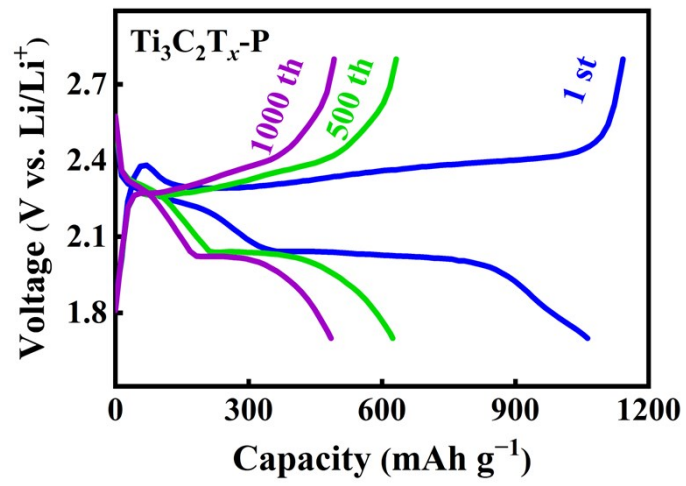

Fig. S7 GCD profiles of the cell with Ti<sub>3</sub>C<sub>2</sub>T<sub>x</sub>-P separators at a current density of 0.5 C.



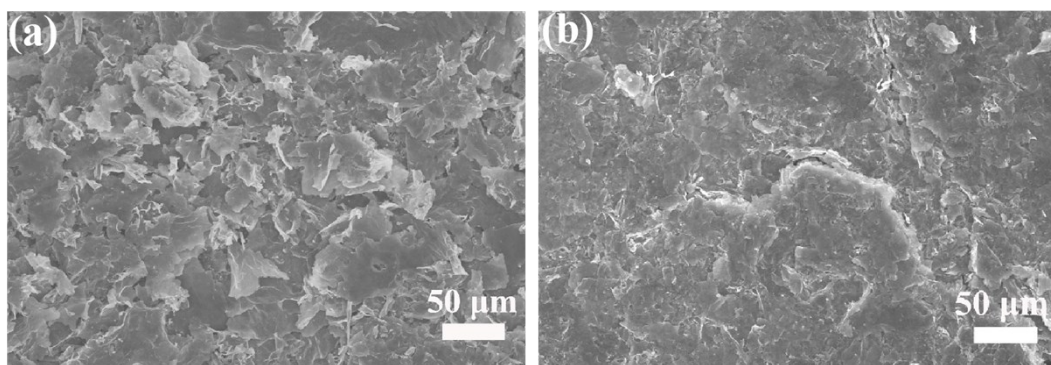

**Fig. S8** SEM images of (a) pure  $\text{Ti}_3\text{C}_2\text{T}_x$  and (b)  $\text{Ti}_3\text{C}_2\text{T}_x$ -P modified separators after 30 cycles at 0.5 C.

**Table S1.** XPS peak fitting results for  $\text{Ti}_3\text{C}_2\text{T}_x$  nanosheets and  $\text{Ti}_3\text{C}_2\text{T}_x$ -P hybrid.**Sample1:  $\text{Ti}_3\text{C}_2\text{T}_x$** 

| <b>Region</b>                                 | <b>BE (eV)</b> | <b>Assigned to</b>      | <b>Substance</b>                  | <b>Reference</b> |
|-----------------------------------------------|----------------|-------------------------|-----------------------------------|------------------|
| <b>Ti 2p<sub>3/2</sub> (2p<sub>1/2</sub>)</b> | 454.9(461.1)   | Ti-C                    | $\text{Ti}_3\text{C}_2\text{T}_x$ | [1]              |
|                                               | 456.4(463.2)   | Ti <sup>2+</sup>        | $\text{TiO}_x$ ( $1.5 < x < 2$ )  | [2]              |
|                                               | 458.9(464.8)   | Ti-O                    | $\text{TiO}_2$                    | [2,3]            |
| <b>O 1s</b>                                   | 530.0          | $\text{TiO}_2$          | $\text{TiO}_2$                    | [2]              |
|                                               | 531.9          | C-Ti-O                  | $\text{Ti}_3\text{C}_2\text{O}_x$ | [4,5]            |
|                                               | 533.0          | $\text{Al}_2\text{O}_3$ |                                   | [4,5]            |
| <b>C 1s</b>                                   | 280.9          | C-Ti                    | $\text{Ti}_3\text{C}_2\text{T}_x$ | [1]              |
|                                               | 281.7          | C-Ti-O                  | C                                 | [2,6]            |
|                                               | 284.7          | C-C                     | C                                 | [2,6]            |
|                                               | 285.8          | C-O                     | C                                 | [2,6]            |
|                                               | 288.8          | C=O                     | C                                 | [2,6]            |

**Sample2: Ti<sub>3</sub>C<sub>2</sub>T<sub>x</sub>-P**

| <b>Region</b>                                 | <b>BE (eV)</b> | <b>Assigned to</b>               | <b>Substance</b>                                 | <b>Reference</b> |
|-----------------------------------------------|----------------|----------------------------------|--------------------------------------------------|------------------|
| <b>Ti 2p<sub>3/2</sub> (2p<sub>1/2</sub>)</b> | 455.3(461.2)   | Ti-C                             | Ti <sub>3</sub> C <sub>2</sub> T <sub>x</sub>    | [1,5]            |
|                                               | 456.4(463.2)   | Ti <sup>2+</sup>                 | TiO <sub>x</sub>                                 | [2]              |
|                                               | 459.3(464.8)   | Ti-O                             | (1.5<x<2)<br>TiO <sub>2</sub>                    | [3,4]            |
| <b>O 1s</b>                                   | 529.8          | TiO <sub>2</sub>                 | TiO <sub>2</sub>                                 | [2]              |
|                                               | 531.7          | C-Ti-O/PSS                       | Ti <sub>3</sub> C <sub>2</sub> T <sub>x</sub> -P | [3]              |
|                                               | 533.2          | PEDOT                            | PEDOT                                            | [4,7]            |
| <b>C 1s</b>                                   | 281.6          | C-Ti-O                           | C                                                | [2,6]            |
|                                               | 284.7          | C-C                              | C                                                | [2,6]            |
|                                               | 285.6          | C-O                              | C                                                | [2,6]            |
|                                               | 288.8          | C=O                              | C                                                | [2,6]            |
| <b>S 2p</b>                                   | 163.3          | PEDOT2p <sub>3/2</sub>           | PEDOT: PSS                                       | [5,7]            |
|                                               | 164.4          | PEDOT2p <sub>1/2</sub>           | PEDOT: PSS                                       | [5,7]            |
|                                               | 165.4          | PEDOT Oxidized (O <sub>x</sub> ) | PEDOT: PSS                                       | [5,7]            |
|                                               | 167.7          | PSS2p <sub>3/2</sub>             | PEDOT: PSS                                       | [5,7]            |
|                                               | 168.8          | PSS2p <sub>1/2</sub>             | PEDOT: PSS                                       | [5,7]            |

**Table S2.** Electrical conductivities of  $\text{Ti}_3\text{C}_2\text{T}_x$  nanosheets and  $\text{Ti}_3\text{C}_2\text{T}_x\text{-P}$  hybrid.

| <b>Samples</b>                             | <b>Conductivity, S/cm</b> |
|--------------------------------------------|---------------------------|
| $\text{Ti}_3\text{C}_2\text{T}_x$          | 1.66                      |
| $\text{Ti}_3\text{C}_2\text{T}_x\text{-P}$ | 3.19                      |

## References

- [1] J. Halim, K.M. Cook, M. Naguib, P. Eklund, Y. Gogotsi, J. Rosen, M.W. Barsoum, *Appl. Surf. Sci.*, 2016, **362**, 406–417.
- [2] Q.S. Fu, J. Wen, N. Zhang, L.L. Wu, M.Y. Zhang, S.Y. Lin, H. Gao, X.T. Zhang, *RSC Adv.*, 2017, **7**, 11998–12005.
- [3] M. Ghidui, J. Halim, S. Kota, D. Bish, Y. Gogotsi, M.W. Barsoum, *Chem. Mater.*, 2016, **28**, 3507–3514.
- [4] E. Satheeshkumar, T. Makaryan, A. Melikyan, H. Minassian, Y. Gogotsi, M. Yoshimura, *Sci. Reports*, 2016, **6**, 32049.
- [5] G.S. Gund, J.H. Park, R. Harpalsinh, M. Kota, J.H. Shin, T. Kim, Y. Gogotsi, H.S. Park, *Joule*, 2019, **3**, 1–13.
- [6] L. Li, M.Y. Zhang, X.T. Zhang, Z.G. Zhang, *J. Power Sources*, 2017, **364**, 234–241.
- [7] M. Wang, M. Zhou, L. Zhu, Q. Li, C. Jiang, *Solar Energy*, 2016, **129**, 175–183.
